# Supplementary material
Source: PubMed Central journal article supplement (PMC3673021)

# Supporting Information

## Mechanism Elucidation of the *cis-trans* Isomerization of an Azole Ruthenium-Nitrosyl complex and its Osmium Counterpart

Anatolie Gavriluta,<sup>a,b</sup> Gabriel E. Büchel,<sup>a,b</sup> Leon Freitag,<sup>c</sup> Ghenadie Novitchi<sup>\*,a,d</sup>  
Jean Bernard Tommasino,<sup>a</sup> Erwann Jeanneau,<sup>a</sup> Paul-Steffen Kuhn,<sup>b</sup>  
Leticia González,<sup>\*c</sup> Vladimir B. Arion<sup>\*,b</sup> and Dominique Luneau<sup>\*,a</sup>

<sup>a</sup> *Université Claude Bernard Lyon 1, Laboratoire des Multimatériaux et Interfaces (UMR 5615), Campus de la Doua, 69622 Villeurbanne Cedex, France*

<sup>b</sup> *University of Vienna, Institute of Inorganic Chemistry, Währinger Strasse 42, A-1090 Vienna, Austria*

<sup>c</sup> *University of Vienna, Institute of Theoretical Chemistry, Währinger Strasse 17, A-1090 Vienna, Austria*

<sup>d</sup> *Laboratoire National des Champs Magnétiques Intenses-CNRS, Université Joseph Fourier, 25 Avenue des Martyrs, 38042 Grenoble Cedex 9, France*

Ruthenium-, osmium-nitrosyl, 1*H*-indazole, *cis-trans* isomerization

Corresponding Authors :

\*E-mail: [ghenadie.novitchi@lnmi.cnrs.fr](mailto:ghenadie.novitchi@lnmi.cnrs.fr), (G. N.); [leticia.gonzalez@univie.ac.at](mailto:leticia.gonzalez@univie.ac.at) (L.G.)  
[vladimir.arion@univie.ac.at](mailto:vladimir.arion@univie.ac.at) (V. B. A.); [luneau@univ-lyon1.fr](mailto:luneau@univ-lyon1.fr) (D. L.);

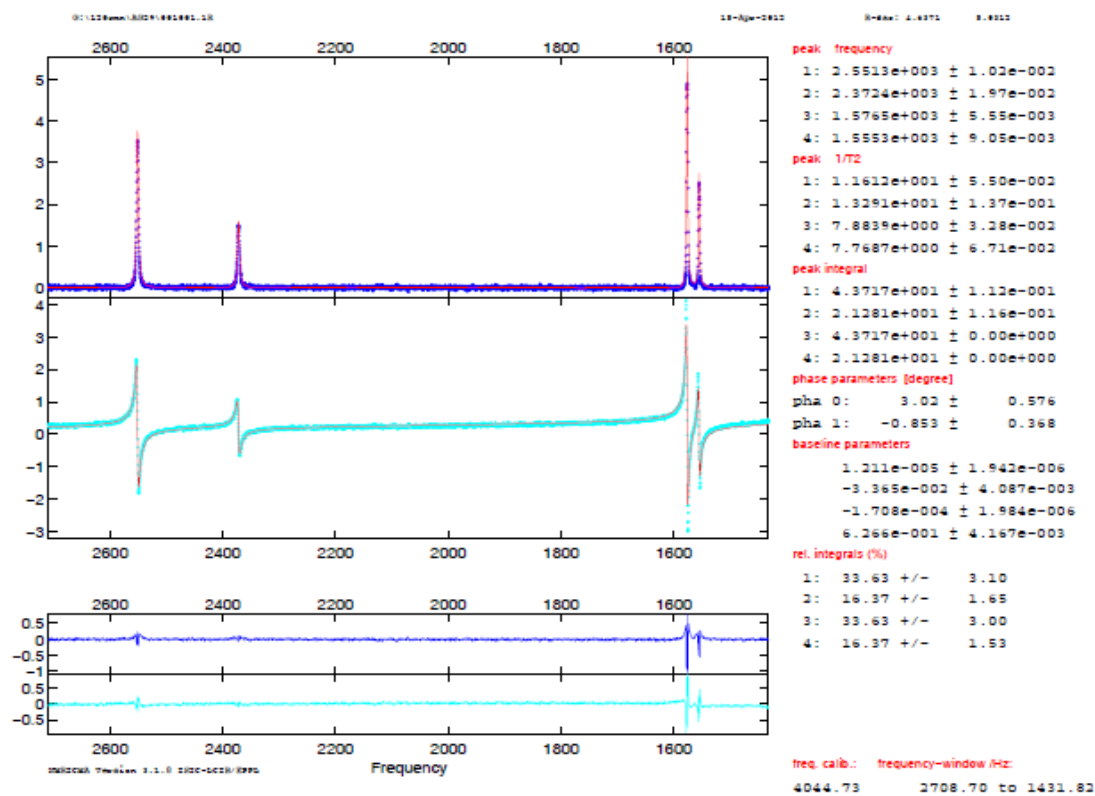

**Figure S1** Simultaneous fitting of the real (top) and imaginary (bottom) part of an  $^1\text{H}$  NMR spectrum using *NMRICMA* program (Helm, L. *NMRICMA*, 3.1.5; EPFL: Lausanne, 2003.)

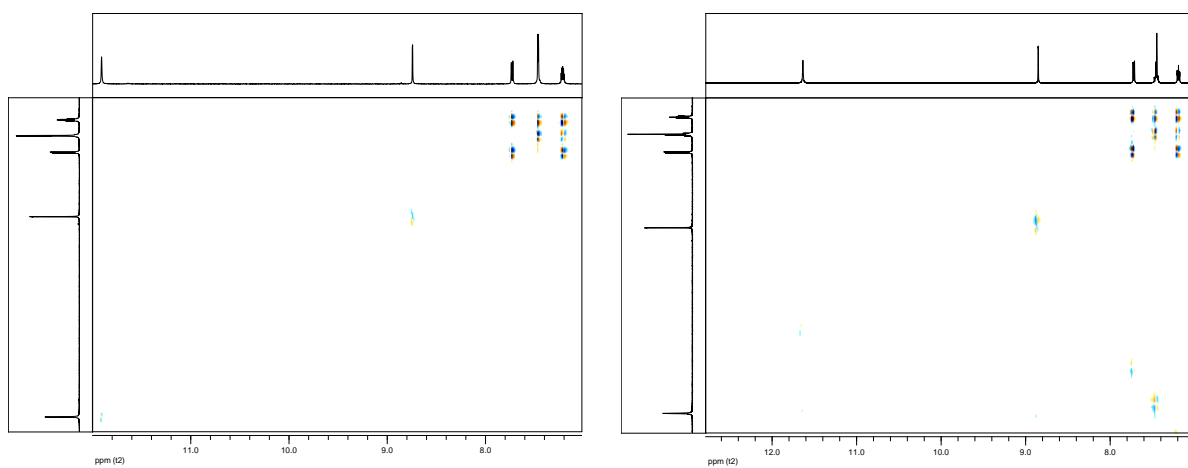

**Figure S2**  $^1\text{H}$ ,  $^1\text{H}$  COSY NMR spectra (500 MHz) of *cis* (left) and *trans* (right)  $[\text{RuCl}_4(\text{NO})(\text{indz})]^-$  in  $\text{C}_2\text{D}_2\text{Cl}_4$  solution. The blue stars correspond to residual isomer present in solution

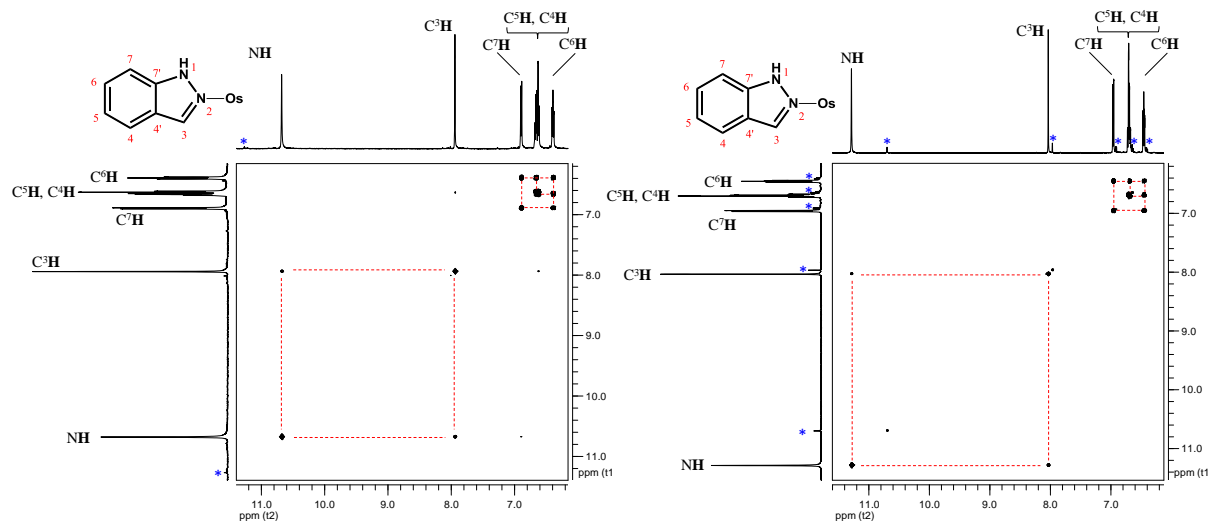

**Figure S3**  $^1\text{H}, ^1\text{H}$  COSY NMR spectra (500 MHz) of *trans* (left) and *cis* (right)  $[\text{OsCl}_4(\text{NO})(\text{indz})]^-$  in  $\text{C}_2\text{D}_2\text{Cl}_4$  solution. The blues stars correspond to residual isomer presenting solution.

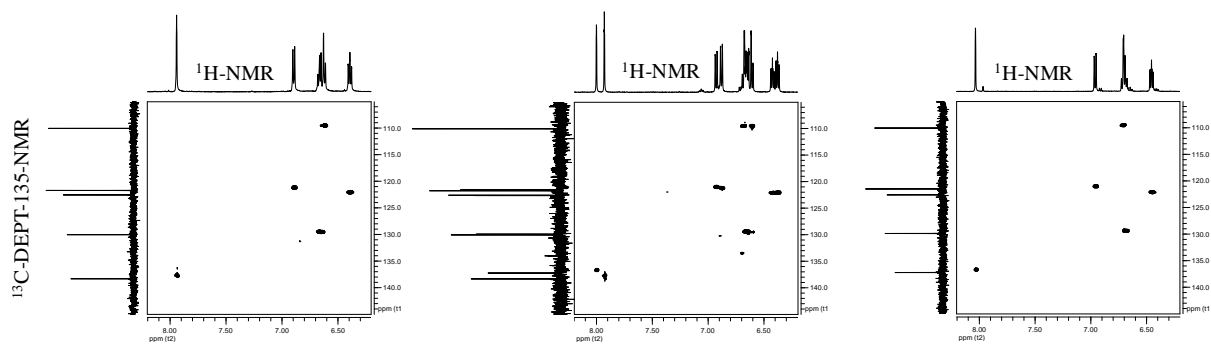

**Figure S4**  $^1\text{H}, ^{13}\text{C}$  HSQC NMR spectra of *trans* (left), *cis* (right)  $[\text{OsCl}_4(\text{NO})(\text{indz})]^-$  and mixture of *trans* and *cis* (in middle) during the isomerization transformation

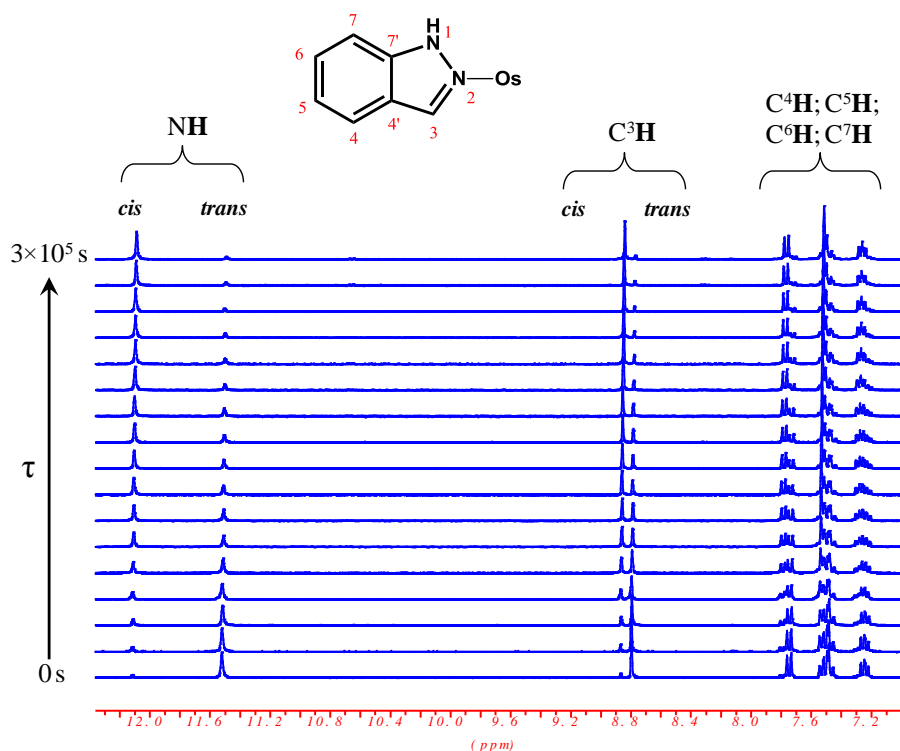

**Figure S5** Evolution of  $^1\text{H}$  NMR spectra (300MHz) of  $\text{trans-}[\text{OsCl}_4(\text{NO})(\text{Ind})]^-$  isomer function of time ( $\tau=0\div 3\times 10^5\text{s}$ ) after heating at  $120^\circ\text{C}$  in  $\text{C}_2\text{D}_2\text{Cl}_4$  solution ( $C_{\text{cis+trans}}=15.26\text{ mmol/L}$ ) showing the formation of the *cis* isomer. (Aromatic region).

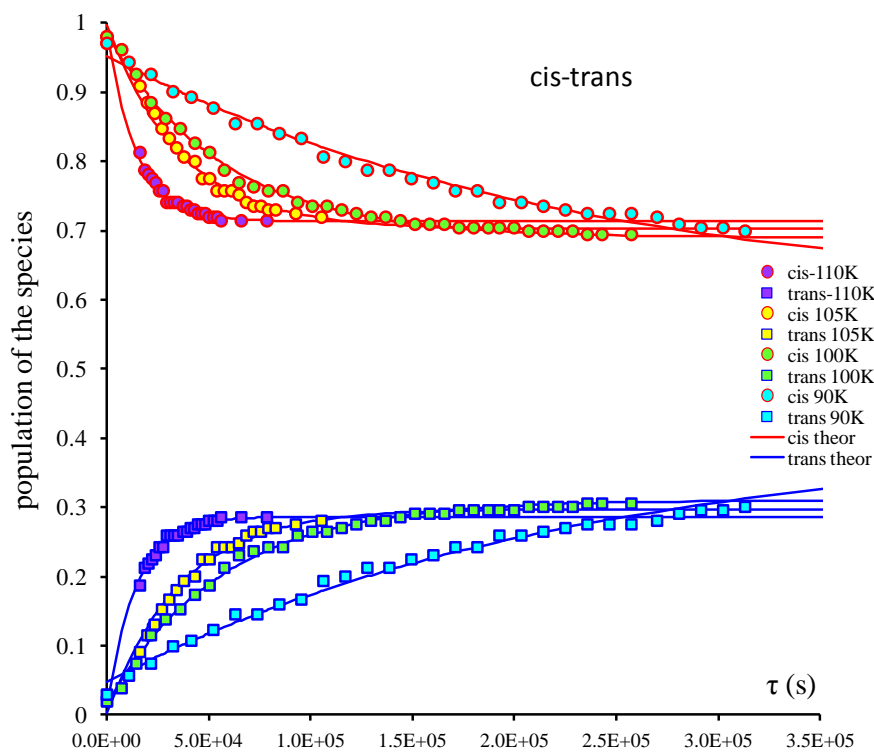

**Figure S6.** NMR Kinetics of the *cis* to *trans* isomerization for  $[\text{RuCl}_4(\text{NO})(\text{Hind})]^-$ . The solid line corresponds to best fit according reversible 1-st order process at indicated temperatures.

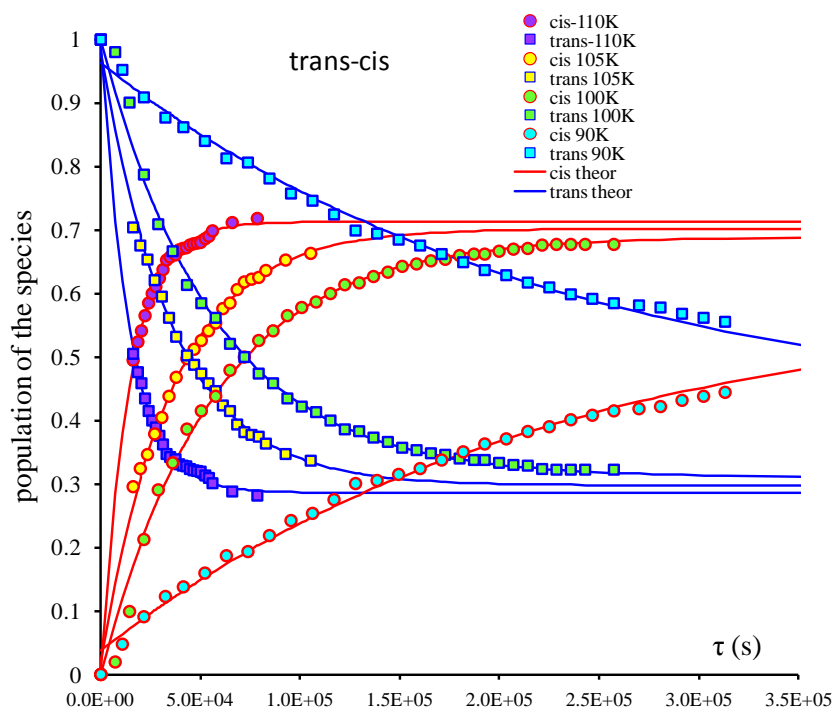

**Figure S7.** NMR Kinetics of the *trans* to *cis* isomerization for  $[\text{RuCl}_4(\text{NO})(\text{Hind})]$ . The solid line corresponds to best fit according reversible I-st order process at indicated temperatures.

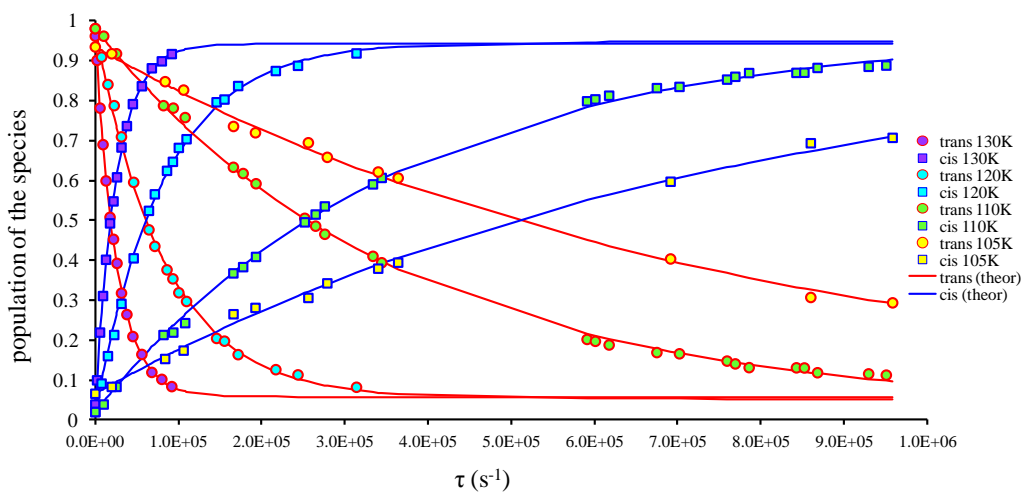

**Figure S8.** NMR Kinetics of the *trans/cis* isomerization for  $[\text{OsCl}_4(\text{NO})(\text{indz})]$ . The solid line corresponds to best fit according reversible I-st order process at indicated temperatures.

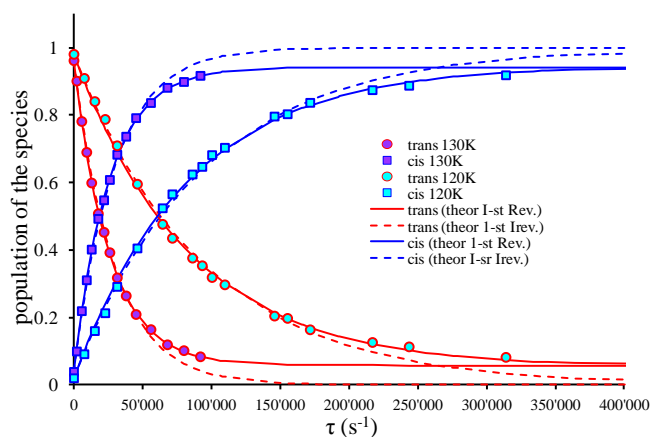

**Figure S9.** NMR Kinetics of the *trans-cis* isomerization for  $[\text{OsCl}_4(\text{NO})(\text{indz})]^-$ . The solid line correspond to best fit according reversible I-st order and the dashed line correspond to irreversible I-st order reaction at indicated temperatures.

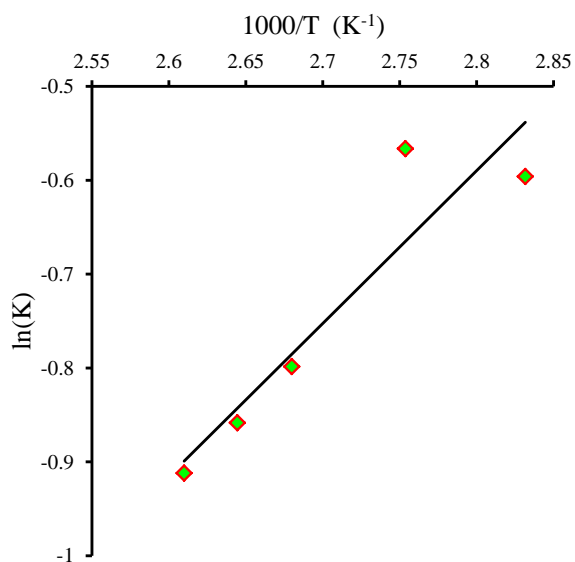

**Figure S10** van't Hoff plot for *cis/trans* isomerization of  $[\text{RuCl}_4(\text{NO})(\text{Hind})]^-$ . Solid line correspond to best fit with following thermodynamic parameters  $\Delta H^\circ = 13.5 \pm 1.5$  kJ/mol  $\Delta S^\circ = -5.2 \pm 3.4$  J/(mol·K)

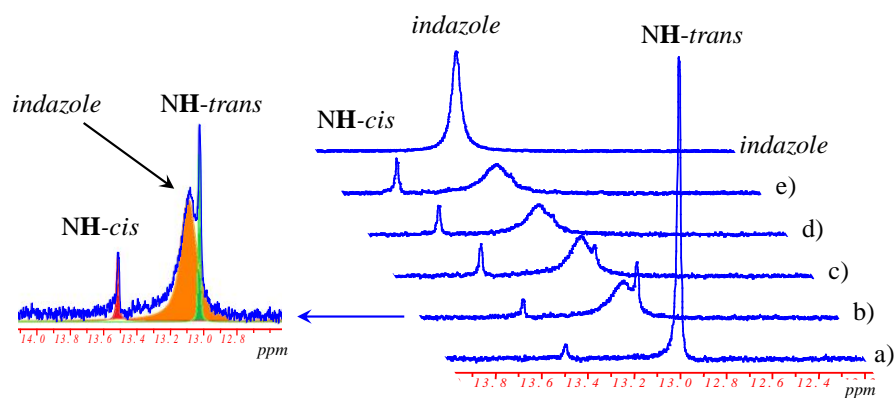

**Figure S11.** Evolution of  $^1\text{H}$  NMR spectra (300MHz) of  $\text{trans-}[\text{OsCl}_4(\text{NO})(\text{Ind})]^-$  isomer function of time: b) 2 days; c) 3 days; d) 4 days; e) 5 days after heating at  $100^\circ\text{C}$  in DMSO solution ( $C_{\text{cis+trans}}=18.51 \text{ mmol/L}$ ). In the left is deconvolution and assignments of signals.

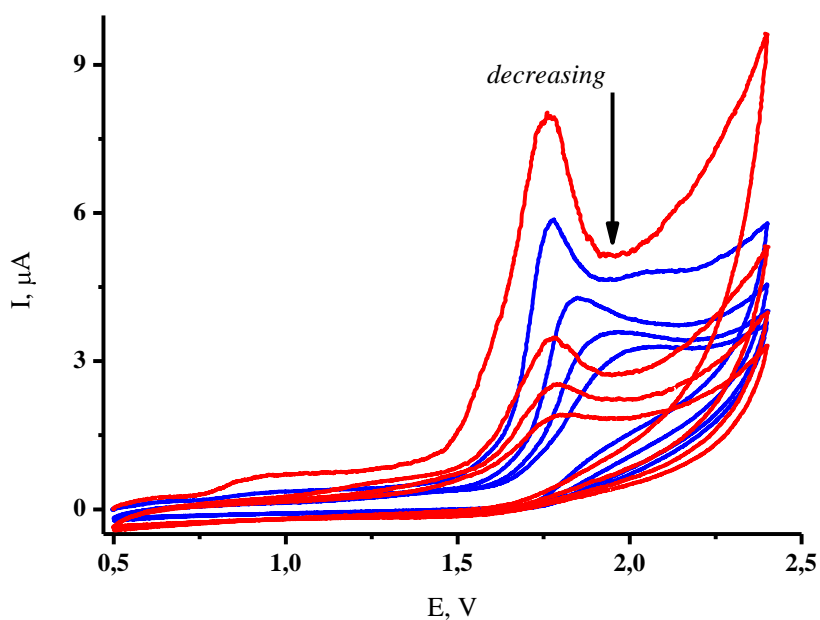

**Figure S12.** Oxidation of  $\text{cis-}[\text{RuCl}_4(\text{NO})(\text{Hind})]^-$ , (red) and  $\text{trans-}[\text{RuCl}_4(\text{NO})(\text{Hind})]^-$ , (blue) by cyclic voltammetry in the same experimental condition as Os isomers

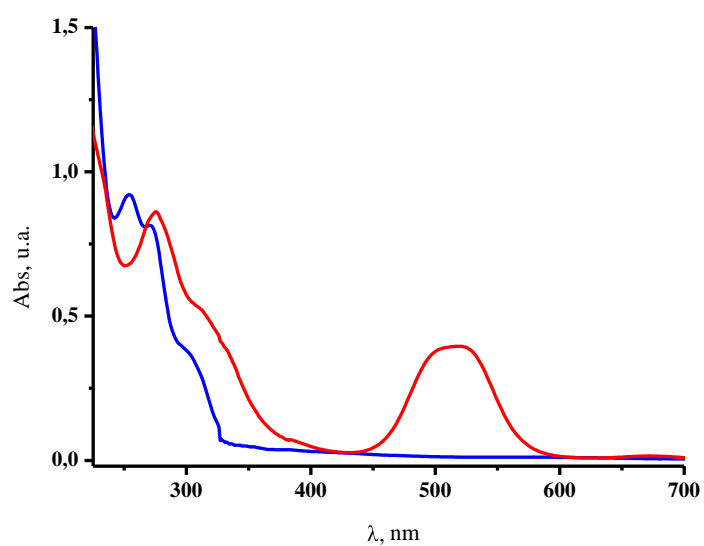

**Figure S13.** UV-vis spectra of acetoneitrile solutions (0.1M) of *trans*-[OsCl<sub>4</sub>(NO)(Hind)]<sup>-</sup>, before (blue) and after (red) electrolysis.

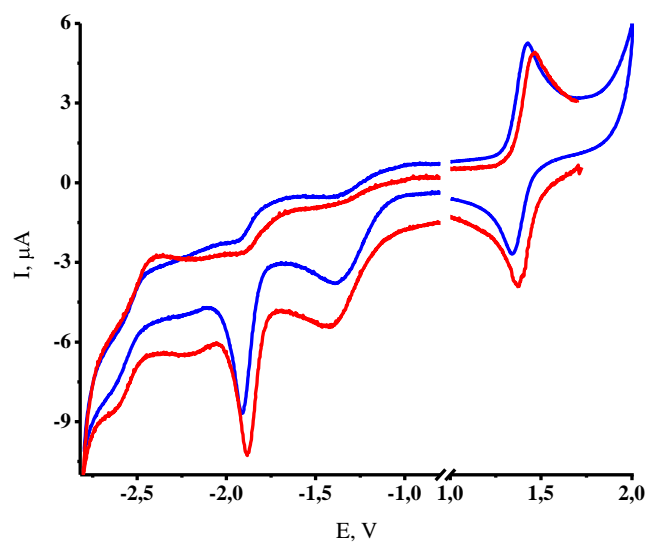

**Figure S14.** Cyclic voltammetry of *trans*-[OsCl<sub>4</sub>(NO)(Hind)]<sup>-</sup>, before (blue) and after (red) electrolysis.



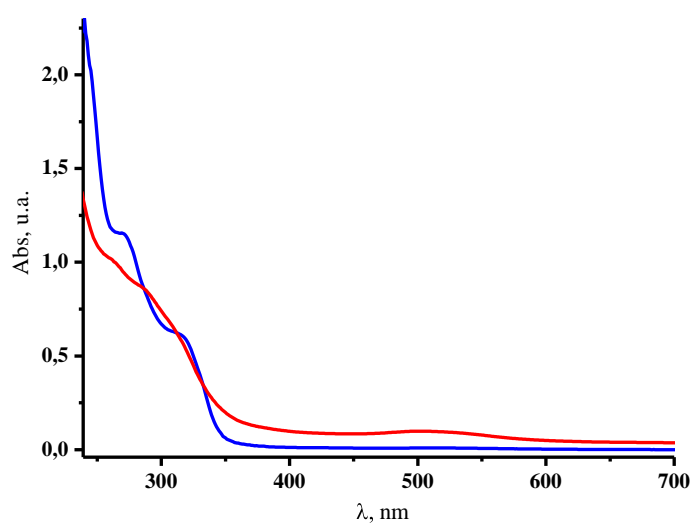

**Figure S15.** UV-vis spectra of acetonitrile solutions (0.1M) of *cis*-[OsCl<sub>4</sub>(NO)(Hind)]<sup>-</sup>, before (blue) and after (red) electrolysis.

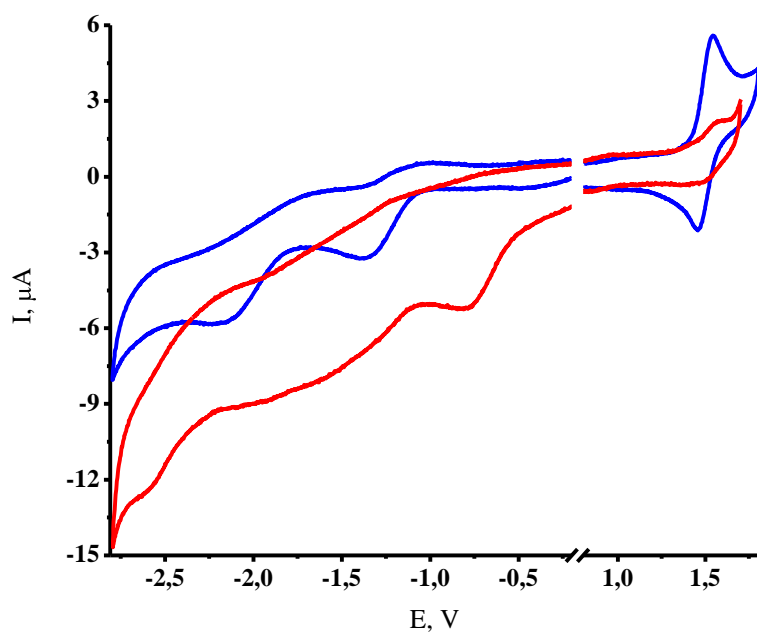

**Figure S16.** Cyclic voltammetry of *cis*-[OsCl<sub>4</sub>(NO)(Hind)]<sup>-</sup>, before (blue) and after (red) electrolysis.

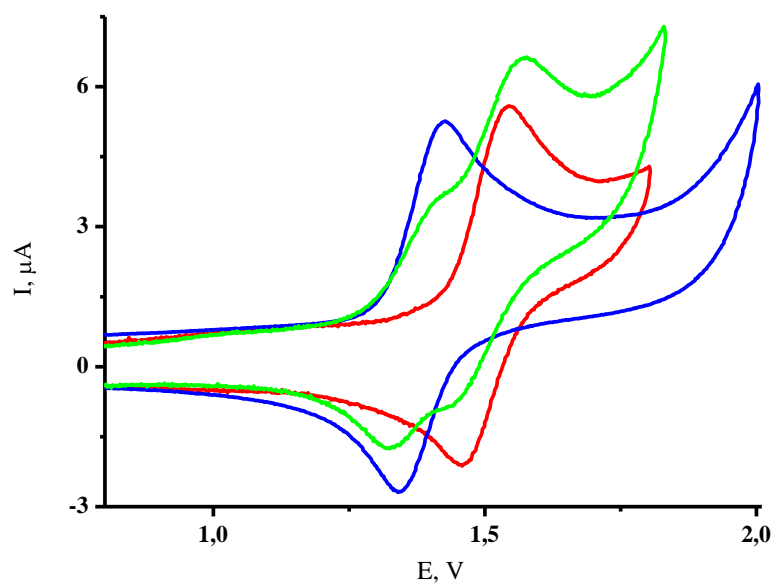

**Figure S17.** Cyclic voltammetry of *cis*-[OsCl<sub>4</sub>(NO)(Hind)]<sup>-</sup>, (red), *trans*-[OsCl<sub>4</sub>(NO)(Hind)]<sup>-</sup>, (blue) and their mixture (green) at 100 mV/s on GC electrode (3 mm) in acetonitril solution.

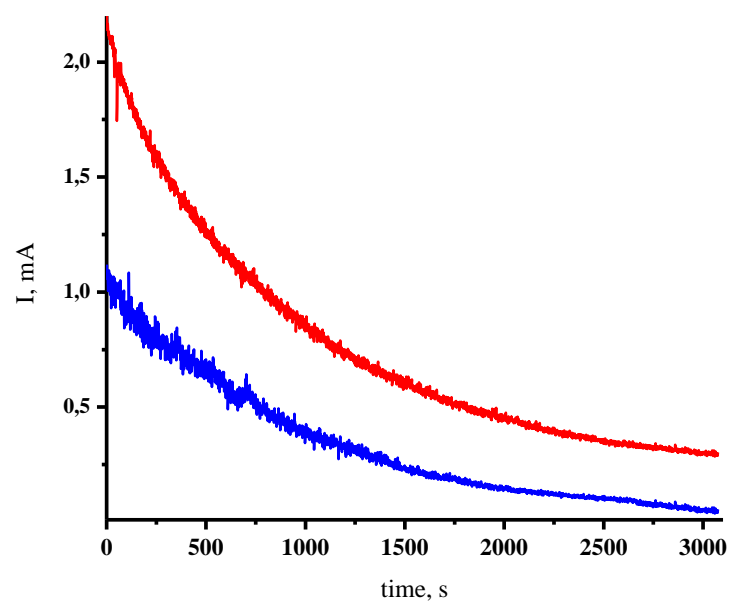

**Figure S18.** Exhaustive electrolysis of *cis*-[OsCl<sub>4</sub>(NO)(Hind)]<sup>-</sup>, (red) – corresponding 2e and *trans*-[OsCl<sub>4</sub>(NO)(Hind)]<sup>-</sup>, (blue) – corresponding 1e.

All geometries reported below have been optimized at the B3LYP/6-31G\* level of theory.

### Optimised structures of 1 and 2:

**Table S1.** Optimised structure of *cis*-[RuCl<sub>4</sub>(NO)(Hind)]<sup>-</sup>

|    |           |           |           |
|----|-----------|-----------|-----------|
| Ru | -1.276071 | 0.011832  | 0.061736  |
| Cl | -1.036380 | -2.426595 | 0.090517  |
| Cl | -1.049035 | -0.096205 | -2.300444 |
| Cl | -1.461495 | 2.416166  | -0.141124 |
| Cl | -3.654993 | -0.203862 | -0.205199 |
| O  | -1.498289 | 0.115384  | 2.963741  |
| N  | 0.835484  | 0.178292  | 0.078594  |
| N  | 1.598765  | -0.939217 | 0.031052  |
| H  | 1.090125  | -1.844591 | 0.012385  |
| N  | -1.409839 | 0.077743  | 1.804046  |
| C  | 1.637940  | 1.249245  | 0.107227  |
| H  | 1.196301  | 2.252773  | 0.137315  |
| C  | 2.996569  | 0.815010  | 0.079427  |
| C  | 4.263281  | 1.455751  | 0.092531  |
| H  | 4.338657  | 2.554243  | 0.131952  |
| C  | 5.405131  | 0.655505  | 0.055214  |
| H  | 6.401859  | 1.126316  | 0.064455  |
| C  | 5.313271  | -0.768110 | 0.005179  |
| H  | 6.241631  | -1.362305 | -0.023018 |
| C  | 4.083949  | -1.429524 | -0.008790 |
| H  | 4.015358  | -2.527323 | -0.046786 |
| C  | 2.926112  | -0.618194 | 0.029130  |

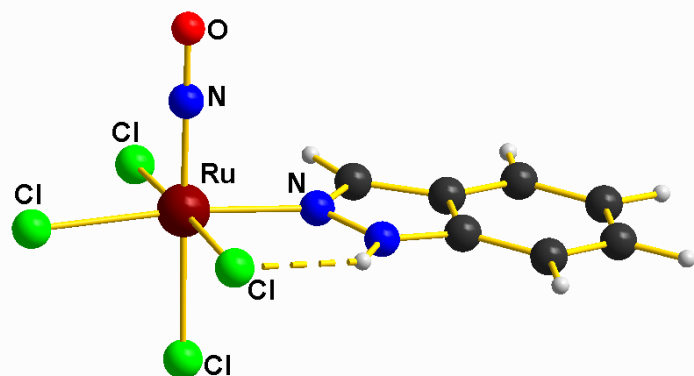

**Table S2.** Optimised structure of *trans*-[RuCl<sub>4</sub>(NO)(Hind)]<sup>-</sup>

|    |           |           |           |
|----|-----------|-----------|-----------|
| Ru | 1.361441  | 0.005087  | 0.000132  |
| Cl | 1.434180  | 2.413687  | 0.000189  |
| Cl | 1.162027  | 0.016383  | 2.403711  |
| Cl | 1.043858  | -2.416562 | 0.000109  |
| Cl | 1.163296  | 0.016491  | -2.403625 |
| N  | -0.792805 | 0.165964  | -0.000251 |
| N  | -1.561942 | -0.946922 | -0.000327 |
| H  | -1.059492 | -1.854941 | -0.000219 |
| C  | -1.594460 | 1.238496  | -0.000162 |
| H  | -1.152240 | 2.241756  | -0.000101 |
| C  | -2.954406 | 0.809996  | -0.000163 |
| C  | -4.219069 | 1.455293  | -0.000096 |
| H  | -4.290699 | 2.554792  | -0.000046 |
| C  | -5.363232 | 0.657818  | -0.000154 |
| H  | -6.358769 | 1.131247  | -0.000142 |
| C  | -5.275555 | -0.767304 | -0.000272 |
| H  | -6.206016 | -1.358879 | -0.000325 |
| C  | -4.048499 | -1.432866 | -0.000298 |
| H  | -3.983381 | -2.531564 | -0.000279 |
| C  | -2.888354 | -0.623710 | -0.000263 |
| N  | 3.091568  | -0.147613 | 0.000181  |
| O  | 4.247749  | -0.261563 | -0.000097 |

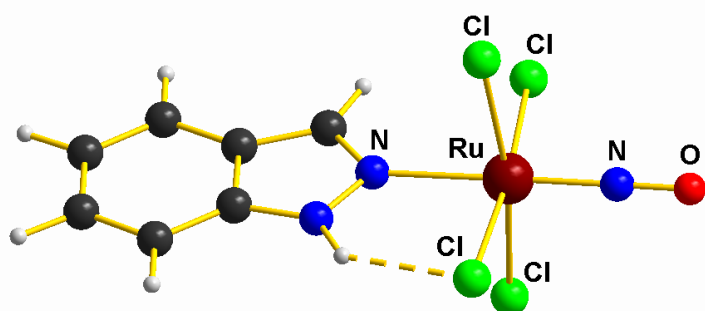

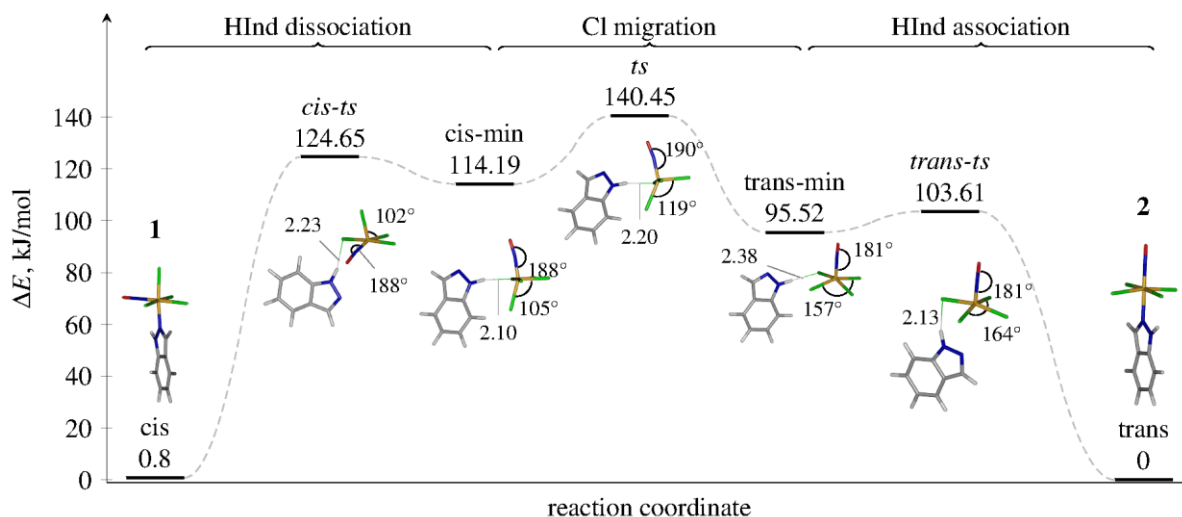

### Transition states and intermediates for the dissociative mechanism

**Table S3.** Optimised structure of the *cis-ts* transition state (cf. Fig. 9a)

|    |            |            |            |
|----|------------|------------|------------|
| Ru | -1.8286261 | -0.2630592 | -0.0122971 |
| Cl | -0.2068541 | -2.0733541 | 0.3057911  |
| Cl | -1.4937186 | -0.5293395 | -2.2925932 |
| Cl | -3.2195174 | 1.6023672  | -0.5326078 |
| Cl | -3.5912617 | -1.6884653 | 0.4694141  |
| O  | -1.2654225 | 0.7782187  | 2.6441964  |
| N  | 1.8142508  | 1.3265149  | 0.2989244  |
| N  | 2.1362990  | 0.0248128  | 0.1516627  |
| H  | 1.3697516  | -0.6953116 | 0.1505347  |
| N  | -1.5695977 | 0.3075682  | 1.6164919  |
| C  | 2.9596347  | 2.0120584  | 0.2833604  |
| H  | 2.9416899  | 3.1059534  | 0.3878927  |
| C  | 4.0830113  | 1.1358408  | 0.1229000  |
| C  | 5.4913736  | 1.2608549  | 0.0368175  |
| H  | 5.9730217  | 2.2519478  | 0.0958641  |
| C  | 6.2587015  | 0.1047703  | -0.1295604 |
| H  | 7.3571454  | 0.1828196  | -0.2002593 |
| C  | 5.6480637  | -1.1799515 | -0.2089641 |
| H  | 6.2862615  | -2.0702583 | -0.3427308 |
| C  | 4.2622404  | -1.3380454 | -0.1279116 |
| H  | 3.7856815  | -2.3289793 | -0.1939191 |
| C  | 3.4868779  | -0.1679454 | 0.0407627  |

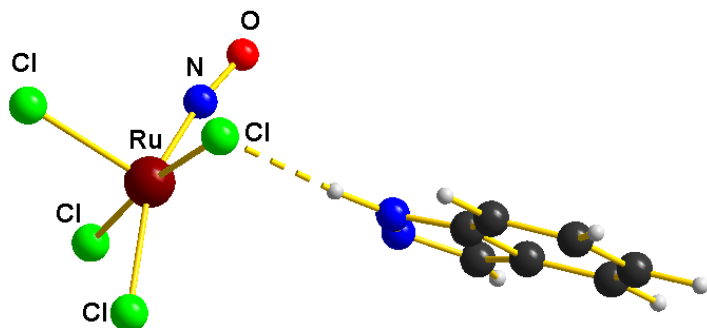

**Table S4.** Optimised structure of the *cis-min* intermediate (cf. Fig. 9a)

|    |           |           |           |
|----|-----------|-----------|-----------|
| Ru | -2.144979 | -0.836111 | -0.381036 |
| Cl | -0.764606 | -1.413157 | 1.526221  |
| Cl | -0.503320 | -1.819543 | -1.716319 |
| Cl | -3.259121 | -0.202294 | -2.402443 |
| Cl | -3.555493 | -2.628719 | 0.026116  |
| O  | -3.509202 | 1.221653  | 1.151385  |
| N  | 2.140927  | 1.411474  | 2.106682  |
| N  | 1.929373  | 0.400074  | 1.228593  |
| H  | 1.035046  | -0.128384 | 1.257405  |
| N  | -3.034452 | 0.341181  | 0.559133  |
| C  | 3.387223  | 1.844478  | 1.893741  |
| H  | 3.789971  | 2.675765  | 2.490197  |
| C  | 4.026389  | 1.094116  | 0.851360  |
| C  | 5.294753  | 1.087459  | 0.216237  |
| H  | 6.078597  | 1.803428  | 0.513945  |
| C  | 5.526393  | 0.149813  | -0.794183 |
| H  | 6.505059  | 0.123614  | -1.301660 |
| C  | 4.517881  | -0.778929 | -1.187569 |
| H  | 4.738548  | -1.500535 | -1.991937 |
| C  | 3.258058  | -0.796841 | -0.581352 |
| H  | 2.473596  | -1.505641 | -0.889451 |
| C  | 3.027678  | 0.149435  | 0.444079  |

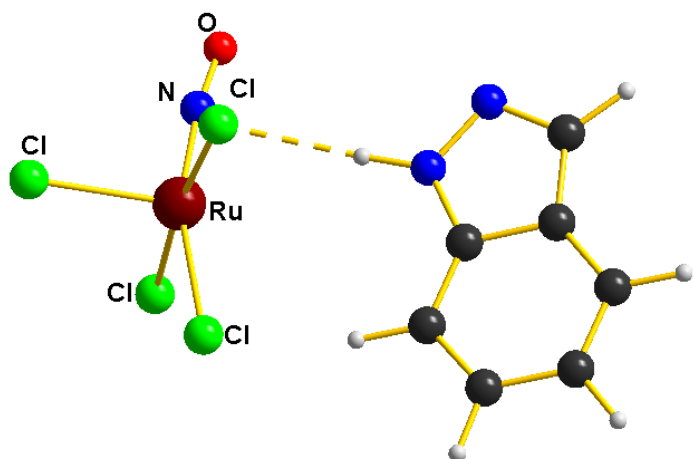

**Table S5.** Optimised structure of the *ts* transition state (cf. Fig. 9a)

|    |            |            |            |
|----|------------|------------|------------|
| Ru | -1.8193053 | -0.0106152 | -0.0338891 |
| Cl | -0.2859209 | -1.3440147 | 1.3035224  |
| Cl | -0.5407613 | -0.6172464 | -1.8890175 |
| Cl | -3.2099955 | 1.2016667  | -1.5494331 |
| Cl | -3.5753555 | -1.3903300 | 0.5912617  |
| O  | -1.9737374 | 2.0822640  | 1.9559744  |
| N  | 3.3291395  | 0.4373665  | 2.3112381  |
| N  | 2.6867923  | -0.0679774 | 1.2348418  |
| H  | 1.6925896  | -0.3823435 | 1.3076510  |
| N  | -1.9947709 | 1.1812292  | 1.2046979  |
| C  | 4.5805789  | 0.6920984  | 1.9193964  |
| H  | 5.2984683  | 1.1189110  | 2.6347203  |
| C  | 4.7800417  | 0.3402200  | 0.5439752  |
| C  | 5.8436480  | 0.3720296  | -0.3923081 |
| H  | 6.8379216  | 0.7540974  | -0.1039023 |
| C  | 5.6044836  | -0.0890099 | -1.6891517 |
| H  | 6.4187970  | -0.0722776 | -2.4338062 |
| C  | 4.3229588  | -0.5795563 | -2.0744192 |
| H  | 4.1714098  | -0.9283859 | -3.1101260 |
| C  | 3.2518316  | -0.6222777 | -1.1786122 |
| H  | 2.2514629  | -0.9806274 | -1.4699580 |
| C  | 3.4998699  | -0.1601000 | 0.1338772  |

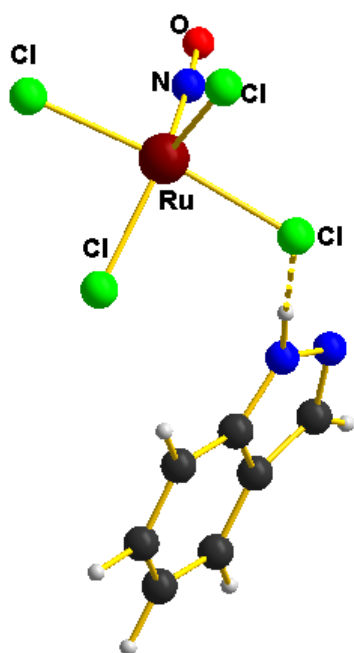

**Table S6.** Optimised structure of the *trans-min* intermediate (cf. Fig. 9a)

|    |           |           |           |
|----|-----------|-----------|-----------|
| Ru | -2.300696 | -0.935220 | -0.144921 |
| Cl | -0.995646 | -0.729878 | 1.829660  |
| Cl | -0.548650 | 0.178844  | -1.283562 |
| Cl | -3.017384 | -1.788944 | -2.225793 |
| Cl | -3.433475 | -2.729036 | 0.888526  |
| O  | -4.192845 | 1.192473  | 0.204549  |
| N  | 2.337065  | 1.333990  | 2.221004  |
| N  | 1.996747  | 0.585715  | 1.143899  |
| H  | 1.017402  | 0.270347  | 1.035239  |
| N  | -3.417416 | 0.330971  | 0.068643  |
| C  | 3.651791  | 1.555514  | 2.129420  |
| H  | 4.163324  | 2.151935  | 2.898549  |
| C  | 4.202213  | 0.931170  | 0.961219  |
| C  | 5.483459  | 0.816547  | 0.363681  |
| H  | 6.365044  | 1.292593  | 0.824198  |
| C  | 5.600994  | 0.085068  | -0.821374 |
| H  | 6.587078  | -0.018829 | -1.303982 |
| C  | 4.465799  | -0.532878 | -1.424082 |
| H  | 4.598563  | -1.099933 | -2.360769 |
| C  | 3.189908  | -0.437537 | -0.860338 |
| H  | 2.311839  | -0.907991 | -1.329285 |
| C  | 3.072916  | 0.300449  | 0.340999  |

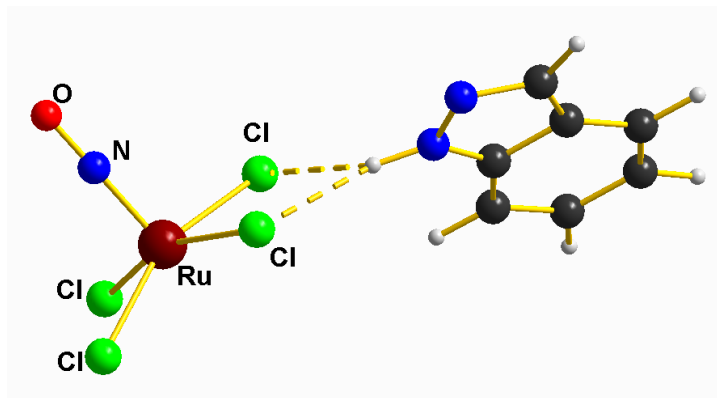



**Table S7.** Optimised structure of the *trans-ts* transition state (cf. Fig. 9a)

|    |            |            |            |
|----|------------|------------|------------|
| Ru | 1.7052941  | -0.0631116 | -0.0492646 |
| Cl | 2.4122990  | 2.1801582  | -0.1140155 |
| Cl | 1.4143159  | 0.1596188  | 2.2794955  |
| Cl | 0.3556797  | -2.0700721 | 0.0516608  |
| Cl | 1.1288071  | 0.1077541  | -2.3287113 |
| N  | -1.8014738 | 1.0767546  | 0.0740692  |
| N  | -2.1978278 | -0.2109422 | 0.0695651  |
| H  | -1.4549794 | -0.9472819 | 0.0674215  |
| C  | -2.9063875 | 1.8229956  | 0.0584086  |
| H  | -2.8234096 | 2.9185192  | 0.0587966  |
| C  | -4.0810403 | 1.0004191  | 0.0411430  |
| C  | -5.4830324 | 1.1990415  | 0.0189166  |
| H  | -5.9058759 | 2.2182114  | 0.0112030  |
| C  | -6.3204347 | 0.0800058  | 0.0058419  |
| H  | -7.4154352 | 0.2158518  | -0.0122880 |
| C  | -5.7852304 | -1.2398020 | 0.0148670  |
| H  | -6.4764512 | -2.1000669 | 0.0041247  |
| C  | -4.4069742 | -1.4705142 | 0.0362878  |
| H  | -3.9928725 | -2.4914121 | 0.0427322  |
| C  | -3.5604535 | -0.3386239 | 0.0488434  |
| N  | 3.2157399  | -0.8318155 | -0.1338248 |
| O  | 4.2795514  | -1.3277369 | -0.1926170 |

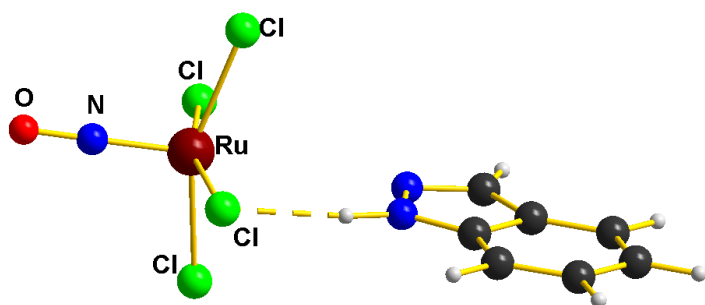

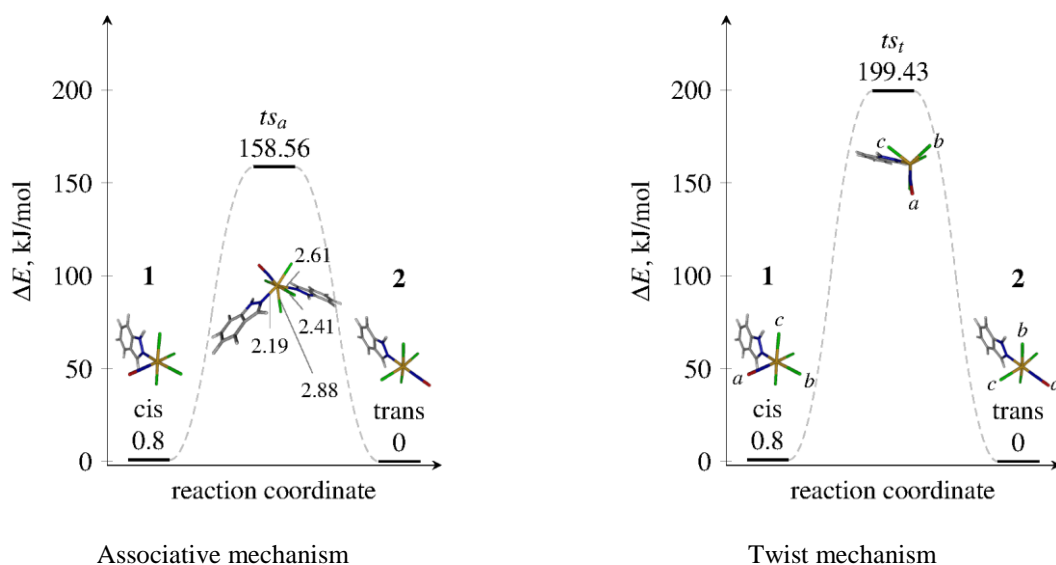

### Transition states for the associative and twist mechanism

**Table S8.** Optimised structure of the transition state of the associative mechanism (cf. Fig. 9b)

|    |           |           |           |
|----|-----------|-----------|-----------|
| Ru | 0.040050  | -0.076913 | 0.200593  |
| N  | 0.321857  | -0.198382 | 1.873079  |
| O  | 0.414491  | -0.274272 | 3.029111  |
| Cl | -1.813033 | 0.246347  | -1.989402 |
| Cl | 2.520750  | -0.383226 | 0.174489  |
| Cl | -0.295061 | -2.452649 | -0.090328 |
| N  | 1.009905  | -0.104535 | -2.237677 |
| C  | 1.577838  | 0.781650  | -3.029880 |
| C  | 1.899590  | 0.185969  | -4.287177 |
| C  | 1.461884  | -1.163311 | -4.161598 |
| N  | 0.954807  | -1.274464 | -2.903160 |
| C  | 2.494503  | 0.608139  | -5.489824 |
| C  | 2.632810  | -0.306893 | -6.523516 |
| C  | 2.187559  | -1.642739 | -6.380327 |
| C  | 1.600220  | -2.091586 | -5.206226 |
| Cl | 0.281496  | 2.328200  | 0.139716  |
| N  | -2.058765 | 0.157396  | 0.786315  |
| N  | -2.603129 | 1.391025  | 0.871285  |
| C  | -3.909301 | 1.312686  | 1.240929  |
| C  | -4.181830 | -0.064737 | 1.467287  |
| C  | -2.961382 | -0.731415 | 1.162579  |
| C  | -4.886145 | 2.305878  | 1.425631  |
| C  | -6.138135 | 1.885945  | 1.844749  |
| C  | -6.426783 | 0.519213  | 2.082626  |
| C  | -5.462995 | -0.458307 | 1.898880  |
| H  | -2.053960 | 2.147633  | 0.466645  |
| H  | -2.709224 | -1.781534 | 1.151932  |
| H  | -5.688246 | -1.506242 | 2.077154  |
| H  | -7.424186 | 0.239194  | 2.410952  |
| H  | -6.922273 | 2.624061  | 1.993569  |
| H  | -4.668446 | 3.353656  | 1.242390  |
| H  | 0.471739  | -2.038337 | -2.443857 |
| H  | 1.259571  | -3.117678 | -5.099101 |
| H  | 2.308952  | -2.333384 | -7.211720 |

|   |          |          |           |
|---|----------|----------|-----------|
| H | 1.726208 | 1.792168 | -2.677380 |
| H | 3.088867 | 0.001829 | -7.461097 |
| H | 2.837100 | 1.633480 | -5.605949 |

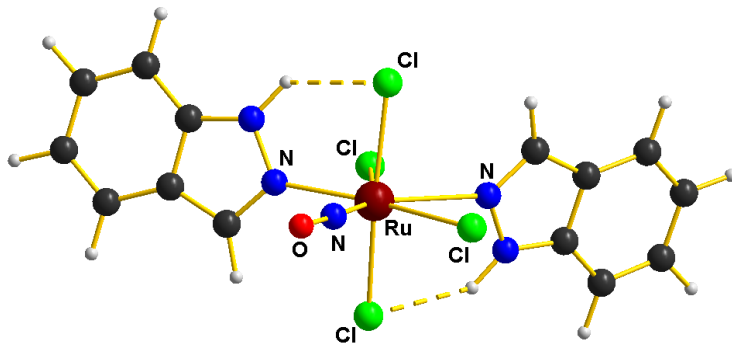

**Table S9.** Optimised structure of the transition state of the twist mechanism (cf. Fig. 9c)

|    |           |           |           |
|----|-----------|-----------|-----------|
| Ru | -0.002133 | -0.004186 | -0.003193 |
| N  | -0.002965 | 0.002165  | 2.475156  |
| C  | -0.297303 | -0.960282 | 3.330805  |
| C  | 0.100306  | -0.585947 | 4.647175  |
| C  | 0.669792  | 0.709135  | 4.497157  |
| N  | 0.590721  | 1.002004  | 3.171712  |
| C  | 0.044159  | -1.174436 | 5.925222  |
| C  | 0.545622  | -0.465097 | 7.004405  |
| C  | 1.104635  | 0.826142  | 6.835024  |
| C  | 1.177239  | 1.432392  | 5.591043  |
| N  | 1.287736  | -0.008314 | -1.138860 |
| O  | 2.090310  | -0.182434 | -1.960263 |
| Cl | -1.933396 | -1.346514 | 0.522179  |
| Cl | -1.457592 | 0.844652  | -1.721916 |
| Cl | 0.317297  | 2.341364  | 0.465335  |
| Cl | 1.391708  | -2.140459 | 0.616705  |
| H  | 0.811029  | 1.841244  | 2.642643  |
| H  | -0.761188 | -1.863732 | 2.966073  |
| H  | -0.383407 | -2.164690 | 6.057826  |
| H  | 0.513266  | -0.900459 | 7.999789  |
| H  | 1.487708  | 1.353604  | 7.705314  |
| H  | 1.608390  | 2.421508  | 5.465845  |

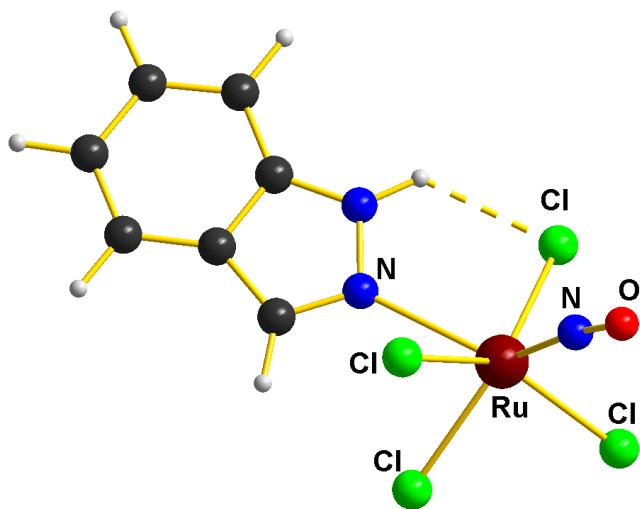

Supplement: ic4004824_si_002.pdf [file ic4004824_si_002.pdf]
